# Supplementary material for: Short-Term Autophagy Preconditioning Upregulates the Expression of COX2 and PGE2 and Alters the Immune Phenotype of Human Adipose-Derived Stem Cells In Vitro
Source: MDPI journal article supplement (doi:10.3390/cells11091376), 2022-04-19
Supplement: s1 [file s1]

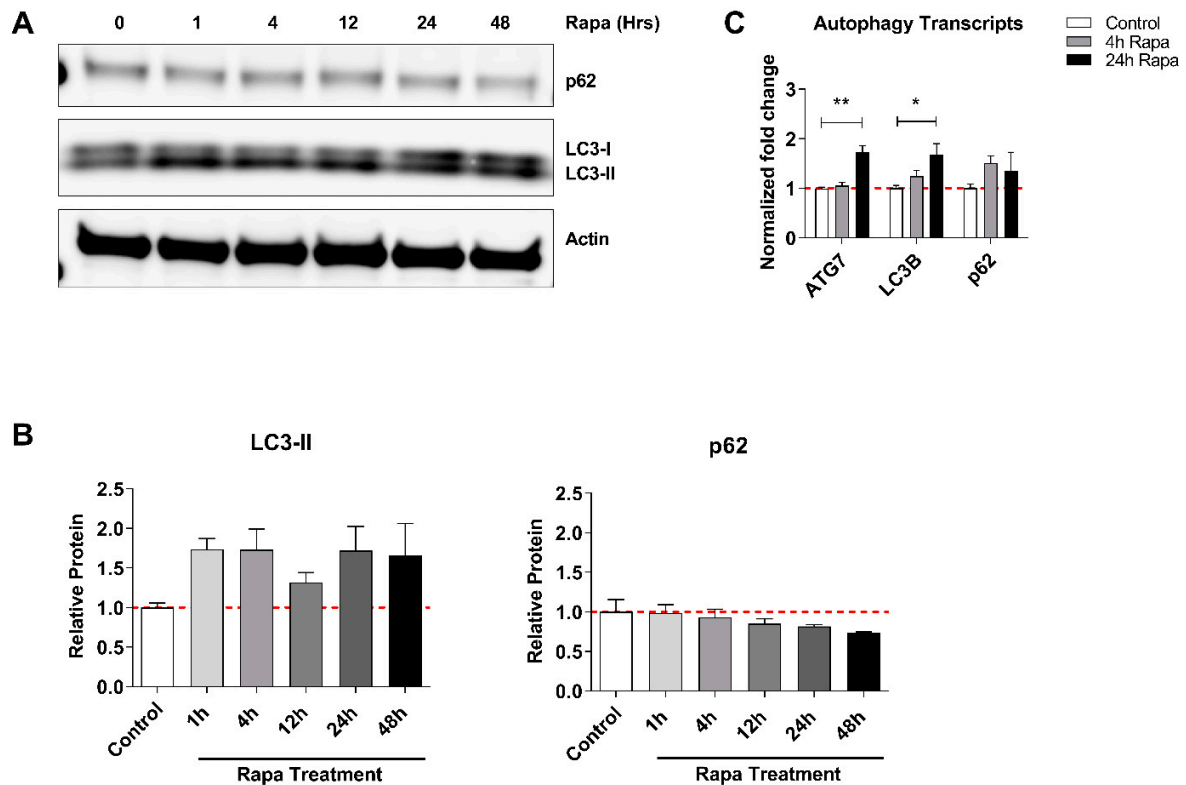

Supplementary Figure S1: *Rapamycin induces autophagy in hASCs.*

(A) Representative Western Blot (WB) of p62, LC3-II, and  $\beta$ -Actin in Rapa-ASCs. (B) Densitometric analysis of WB. Data are presented as means  $\pm$  SEM of 3 independent experiments. (C) Transcriptional analysis of Atg7, LC3B, and p62 in Rapa-ASCs. Data are presented as means  $\pm$  SEM of 4 independent experiments. Statistical analysis was performed using one-way analysis of variance (ANOVA) and Tukey's post-hoc multiple comparisons. Statistical differences between the means are marked with \* $p < 0.05$ , \*\* $p < 0.01$ , \*\*\* $p < 0.001$ . Abbreviations: Rapa, Rapamycin; p62, ubiquitin-binding protein p62; LC3B, microtubule-associated proteins 1A/1B light chain 3B; LC3-II, LC3-phosphatidylethanolamine conjugate; ATG7, Autophagy Related 7.
